## Statistical test

## Number of observations

| Threshold | Wilcoxon signed-rank<br>W/n <sub>obs</sub> |                |              | Kruskal-Wallis<br>$\chi^2$ | Dunn's<br>post-hoc z |                       |                  |
|-----------|--------------------------------------------|----------------|--------------|----------------------------|----------------------|-----------------------|------------------|
|           | Computer > 0                               | Individual > 0 | Group > 0    |                            | Group ≠ Baseline     | Individual ≠ Baseline | Group ≠ Computer |
| 100%      | ***<br>18.01                               | ***<br>22.08   | ***<br>32.46 | ***<br>41.98               | ***<br>5.86          | ***<br>4.68           | 1.76             |
| 40%       | ***<br>17.86                               | ***<br>19.54   | ***<br>30.57 | ***<br>38.85               | ***<br>5.66          | ***<br>4.40           | 1.66             |
| 35%       | ***<br>15.49                               | ***<br>18.91   | ***<br>30.35 | ***<br>35.79               | ***<br>5.52          | ***<br>4.18           | 1.94             |
| 30%       | **<br>12.63                                | ***<br>18.28   | ***<br>29.78 | ***<br>34.5                | ***<br>5.46          | ***<br>4.05           | *<br>2.31        |
| 25%       | *<br>10.37                                 | ***<br>16.58   | ***<br>27.52 | ***<br>31.72               | ***<br>5.20          | **<br>3.90            | *<br>2.48        |
| 20%       | *<br>9.25                                  | ***<br>16.58   | ***<br>29.04 | ***<br>38.54               | ***<br>5.81          | ***<br>4.11           | **<br>3.02       |
| 15%       | *<br>8.54                                  | ***<br>15.59   | ***<br>27.04 | ***<br>33.42               | ***<br>5.37          | **<br>3.88            | **<br>2.92       |
| 10%       | 6.85                                       | ***<br>14.61   | ***<br>25.83 | ***<br>34.76               | ***<br>5.39          | **<br>3.99            | **<br>3.15       |

  

| Group | Individual | Computer | Baseline | Total |
|-------|------------|----------|----------|-------|
| 97    | 66         | 73       | 132      | 368   |
| 93    | 56         | 71       | 123      | 343   |
| 92    | 55         | 67       | 117      | 331   |
| 91    | 54         | 63       | 116      | 324   |
| 86    | 50         | 60       | 109      | 305   |
| 82    | 50         | 57       | 104      | 293   |
| 78    | 46         | 54       | 93       | 271   |
| 72    | 41         | 47       | 85       | 245   |
